# Supplementary material for: Antithrombotic efficacy and bleeding risks of vaccine-induced immune thrombotic thrombocytopenia treatments
Source: PubMed Central journal article supplement — Blood Adv. 2024 Sep 19;8(22):5744–52. doi: 10.1182/bloodadvances.2024013883 (PMC11599978; doi:10.1182/bloodadvances.2024013883), 2024-09-19

**Supplementary Figure 1: Characterising VITT IgG.** (A) Presence of anti-PF4 or anti-PF4/heparin antibodies in patient sera was measured using a solid phase PF4 (15 µg/mL) or PF4 (15 µg/mL)/heparin (0.1 U/mL) ELISA. (B) Platelet activation was measured by <sup>14</sup>C-SRA in the presence or absence of PF4 (10 µg/mL) or 0.1 U/mL heparin.

**Supplementary Figure 2: Negatively charged anticoagulants interfere with PF4 bound to ELISA plates.** (A) Addition of argatroban, bivalirudin, or fondaparinux up to 16 µg/mL have no effect on plate-bound PF4, while low doses of UF heparin (from 0.1 U/mL) or danaparoid (from 0.25 U/mL) strip off PF4 from the plate. (B) Co-incubation of PF4 and UF heparin or PF4 and danaparoid on ELISA plates stabilises plate-bound PF4. Dashed lines indicate therapeutic plasma level range. Data shown as mean ± S.D.

**Supplementary Figure 3: Affinity purified anti-PF4 IgG from VITT patient sera.** Non-reducing SDS gel showing affinity purified anti PF4 IgG from VITT patient (VITT). Commercial monoclonal IgG (Ctrl) used as a comparison. L indicates ladder.

**Supplementary Figure 4: Effect of increasing doses of PF4 on platelet activation.** PF4-mediated platelet activation across a range of PF4 concentrations from 0 to 50 µg/mL, as measured by anti-CD62p by flow cytometry.

**Supplementary Figure 5: Effect of heparin treatment on HIT mice.** The HIT condition was recreated by intravenous injection of HIT IgG or HIT-like monoclonal antibody (KKO) and intraperitoneal injection of heparin (1 U/g) into FcγRIIIa<sup>+</sup>/hPF4<sup>+</sup> mice<sup>16,18,20</sup>. (A) Platelet counts, (B) platelet lung fluorescence, and (C) body temperature of mice following treatment with control IgG or HIT IgG in the absence or presence of heparin (at 1U/g), with or without heparin infusion via minipump (18 U/kg/h). \*  $p < 0.05$ ; \*\*  $p < 0.01$ ; \*\*\*  $p < 0.001$ , relative to HIT IgG with heparin. Data shown as mean ± S.D.

**A**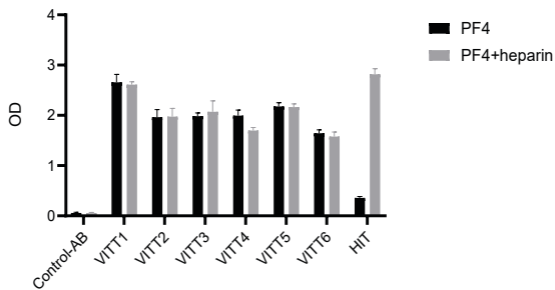**B**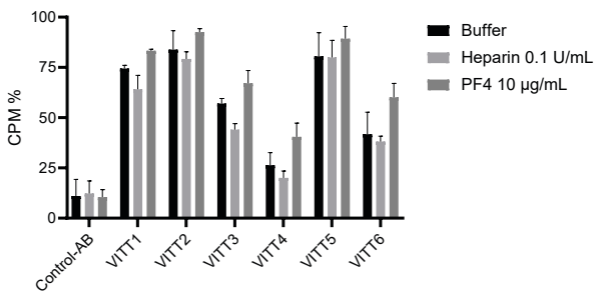

**A**

PF4-coated plate

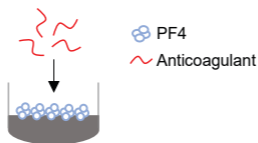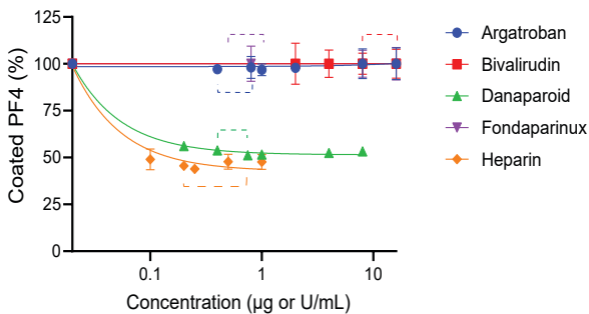**B**

PF4/anticoagulant-coated plate

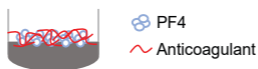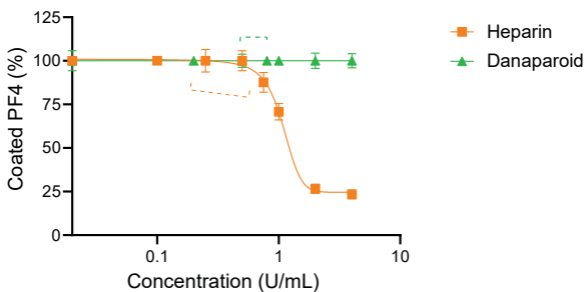

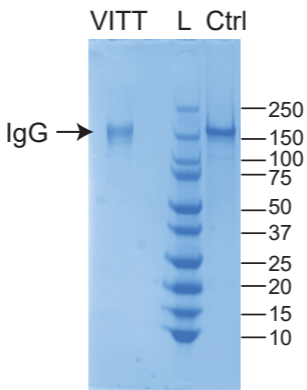

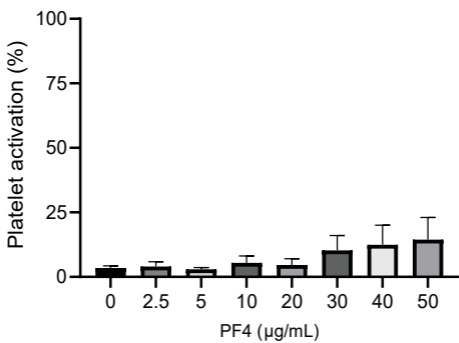

**A**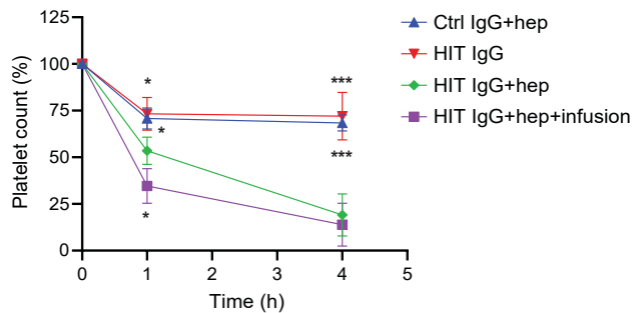**B**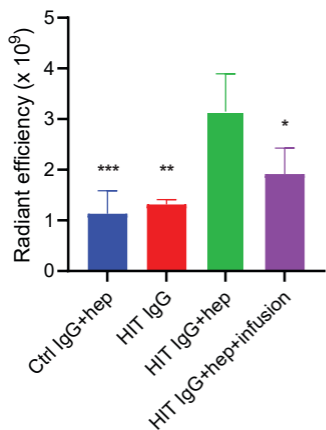**C**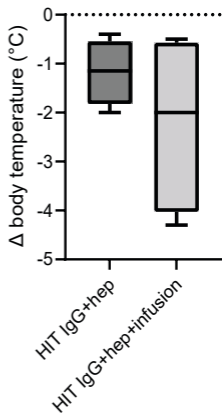

Supplement: BLOODA_ADV-2024-013883-mmc1.pdf [file BLOODA_ADV-2024-013883-mmc1.pdf]
